# Supplementary material for: White Light-Photolysis for the Removal of Polycyclic Aromatic Hydrocarbons from Proximity Firefighting Protective Clothing
Source: MDPI journal article supplement (doi:10.3390/ijerph191610054), 2022-08-15
Supplement: s1 [file s1]

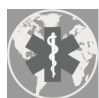

Paper - Supplementary material

## White Light-Photolysis for the Removal of Polycyclic Aromatic Hydrocarbons from Proximity Firefighting Protective Clothing

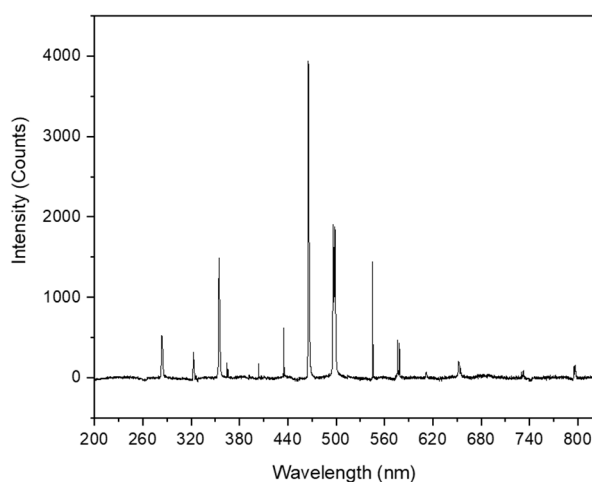

Figure S1. Emission spectrum of 250 W mercury vapor and tungsten filament white light.

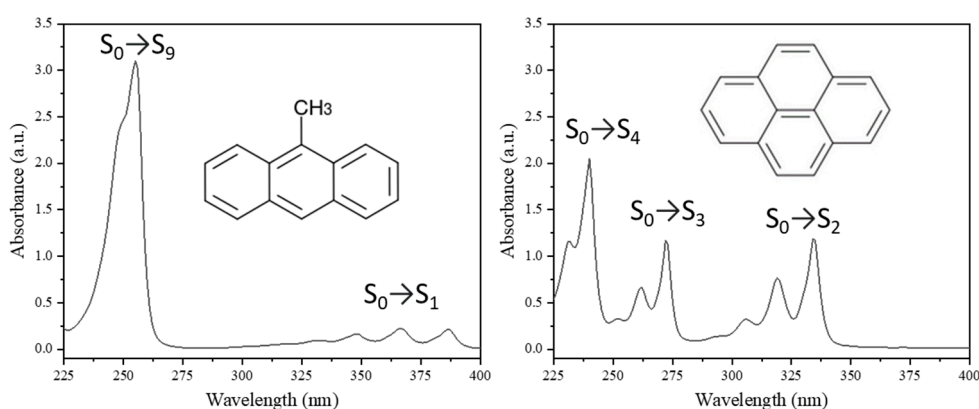

Figure S2. spectrum of 250 W mercury vapor and tungsten filament white light.

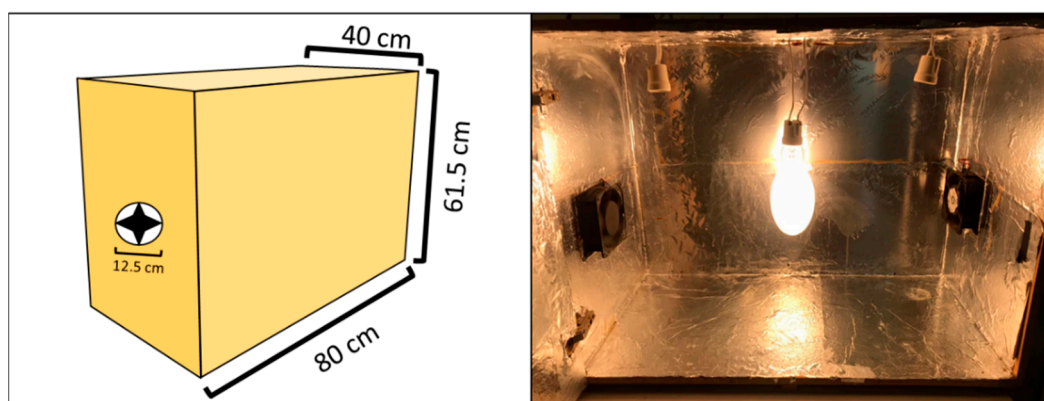

Figure S3. Photoreactor equipped with white light.

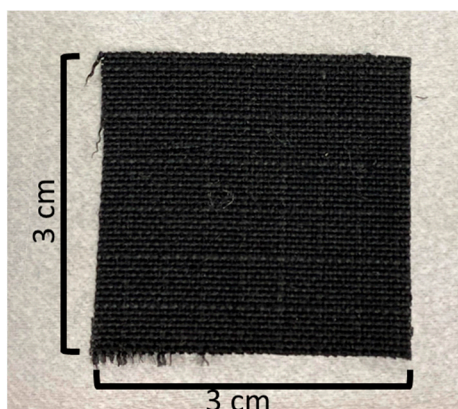

**Figure S4.** Samples of fabric from the outer shell of the firefighting uniform with composition of 58% para-aramid (kevlar®), 40% meta-aramid (nomex®) and 2% carbon, from Unishell®.

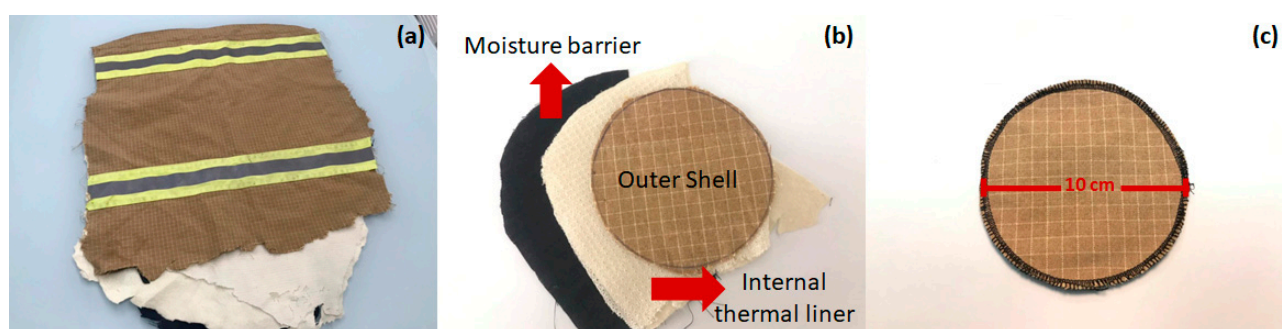

**Figure S5.** Samples of three-layer fabrics from Brazilian firefighters' protective clothing. (a) jacket pieces, (b) three-layer fabrics samples (c) disk with the three layers sewn together.

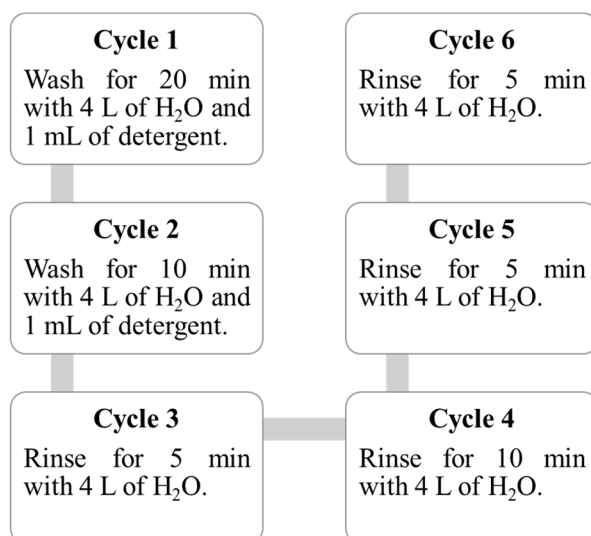

**Figure S6.** Scheme of three-layer fabric laundering decontamination.

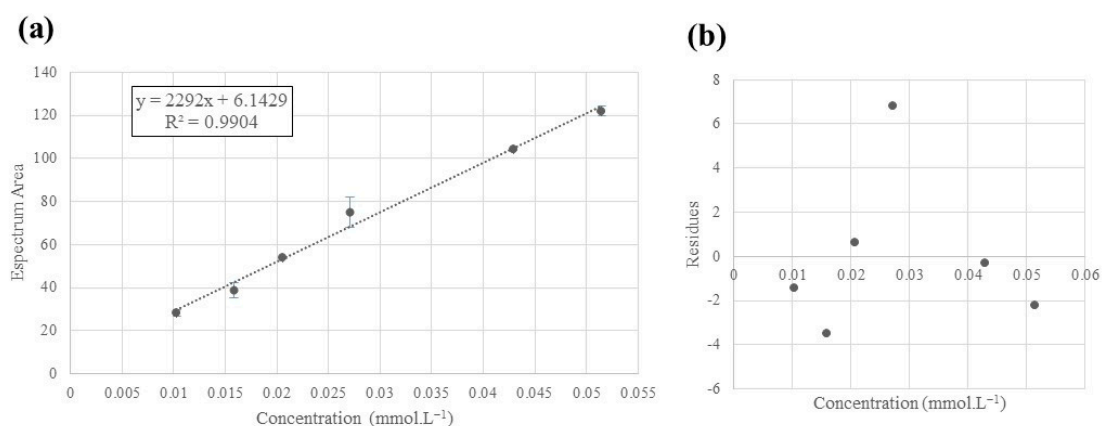

**Figure S7.** UV/VIS (a) calibration curve for PAHs solution and (b) residual graph.

**Table S1.** UV/VIS ANOVA table for PAHs solution.

| Source      | Sum of Squares | Degrees of Freedom | Mean Squares |
|-------------|----------------|--------------------|--------------|
| Regression  | 6780.34        | 1                  | 6780.34      |
| Residual    | 65.96          | 4                  | 16.49        |
| Lack of fit | 65.96          | 4                  | 16.49        |
| Total       | 6846.30        | 5                  | 1369.268     |

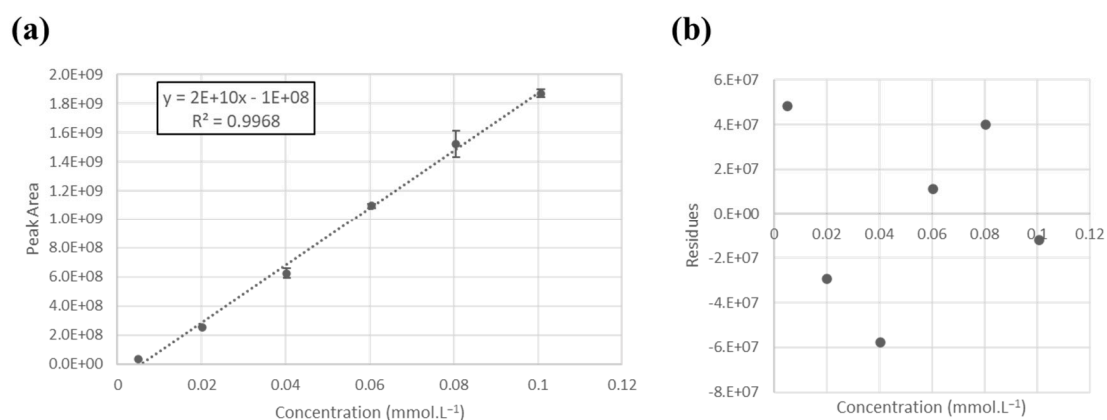

**Figure S8.** GC/MS (a) calibration curve for PAHs solution and (b) residual graph for 9-methylanthracene.

**Table S2.** GC/MS ANOVA table for 9-methylanthracene.

| Source     | Sum of Squares | Degrees of Freedom | Mean Squares |
|------------|----------------|--------------------|--------------|
| Regression | 2.65E+18       | 1                  | 2.65E+18     |

|                    |          |   |          |
|--------------------|----------|---|----------|
| <i>Residual</i>    | 1.36E+16 | 4 | 3.39E+15 |
| <i>Lack of fit</i> | 1.36E+16 | 4 | 3.39E+15 |
| <i>Total</i>       | 2.67E+18 | 5 | 5.33E+17 |

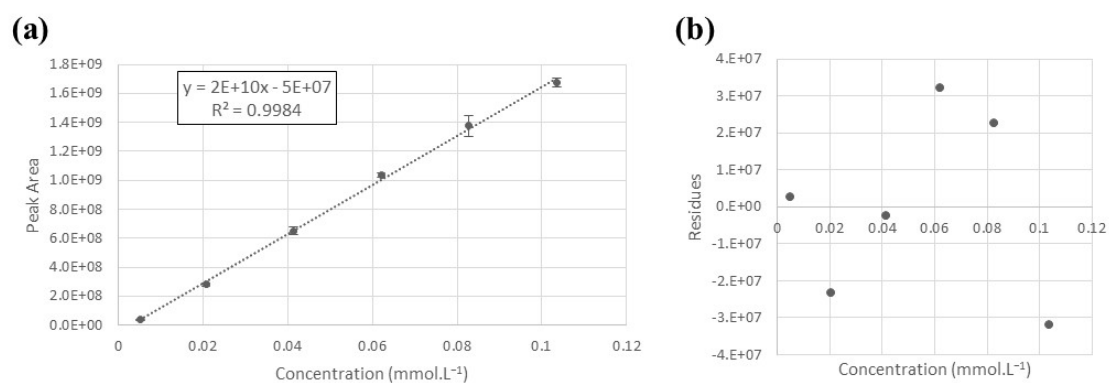

**Figure S9.** GC/MS (a) calibration curve for PAHs solution and (b) residual graph for pyrene.

**Table S3.** GC/MS ANOVA table for pyrene.

| <i>Source</i>      | <i>Sum of Squares</i> | <i>Degrees of Freedom</i> | <i>Mean Squares</i> |
|--------------------|-----------------------|---------------------------|---------------------|
| <i>Regression</i>  | 2.00E+18              | 1                         | 2.00E+18            |
| <i>Residual</i>    | 3.12E+15              | 4                         | 7.81E+14            |
| <i>Lack of fit</i> | 3.12E+15              | 4                         | 7.81E+14            |
| <i>Total</i>       | 2.01E+18              | 5                         | 4.02E+17            |

**Table S4.** Limits of detection (LD) and quantification (LQ), in mmol.L<sup>-1</sup>, obtained by the analytical curves for the analytes using GC/MS.

|           | <b>9-methylanthracene</b>    | <b>Pyrene</b>                |
|-----------|------------------------------|------------------------------|
| <b>LD</b> | 0.00021 mmol.L <sup>-1</sup> | 0.00016 mmol.L <sup>-1</sup> |
| <b>LQ</b> | 0.00071 mmol.L <sup>-1</sup> | 0.00052 mmol.L <sup>-1</sup> |

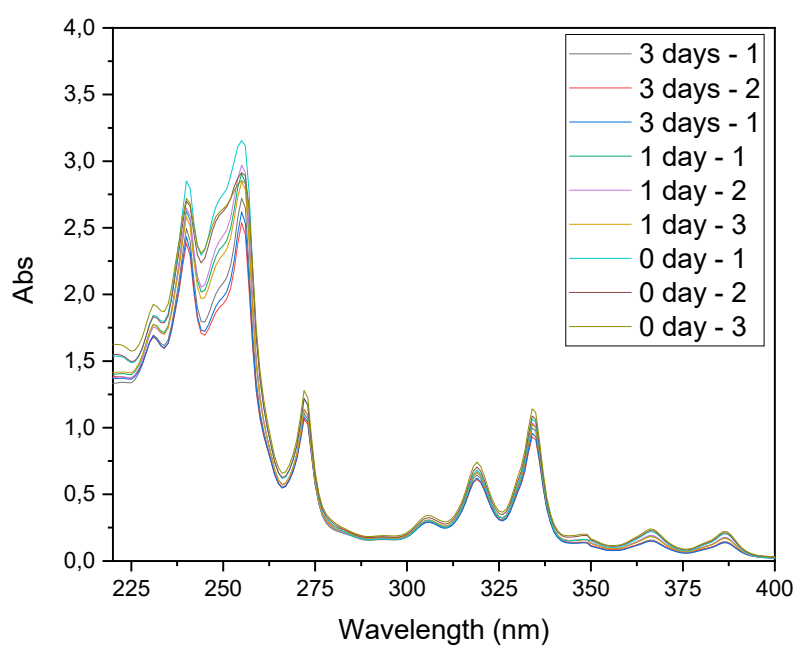

**Figure S10.** UV/VIS spectra of experiments performed in 0, 1 and 3 days with BLK 0% of  $\text{H}_2\text{O}_2$ .

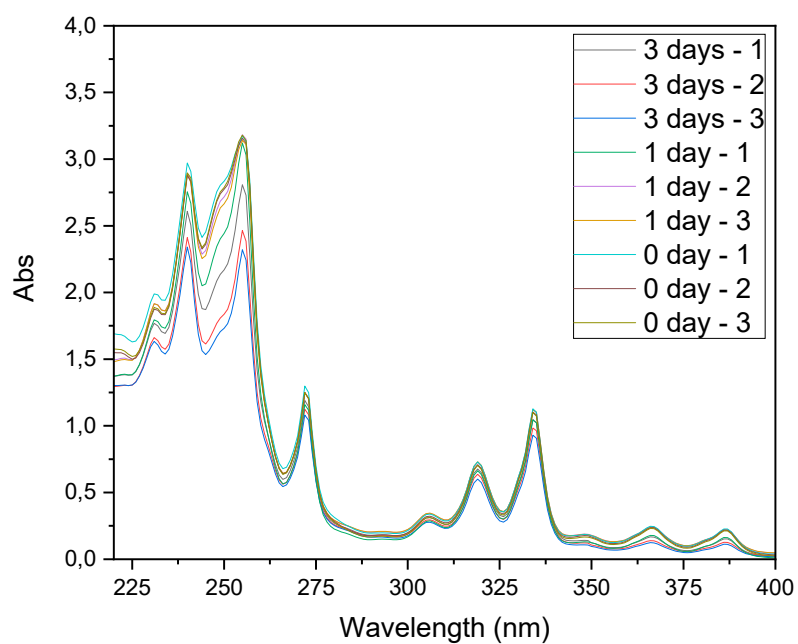

**Figure S11.** UV/VIS spectra of experiments performed in 0, 1 and 3 days with BLK 0.35% of  $\text{H}_2\text{O}_2$ .

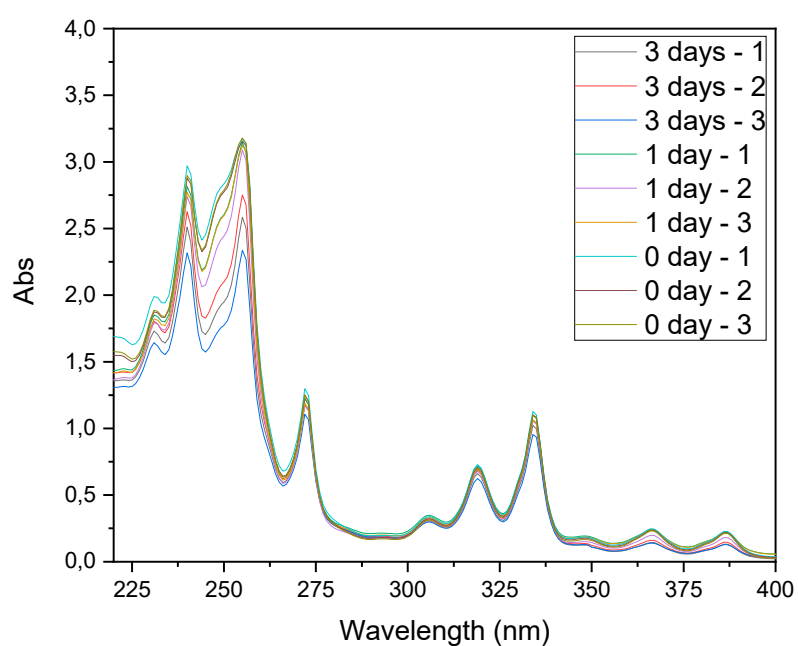

**Figure S12.** UV/VIS spectra of experiments performed in 0, 1 and 3 days with BLK 3.5% of H<sub>2</sub>O<sub>2</sub>.

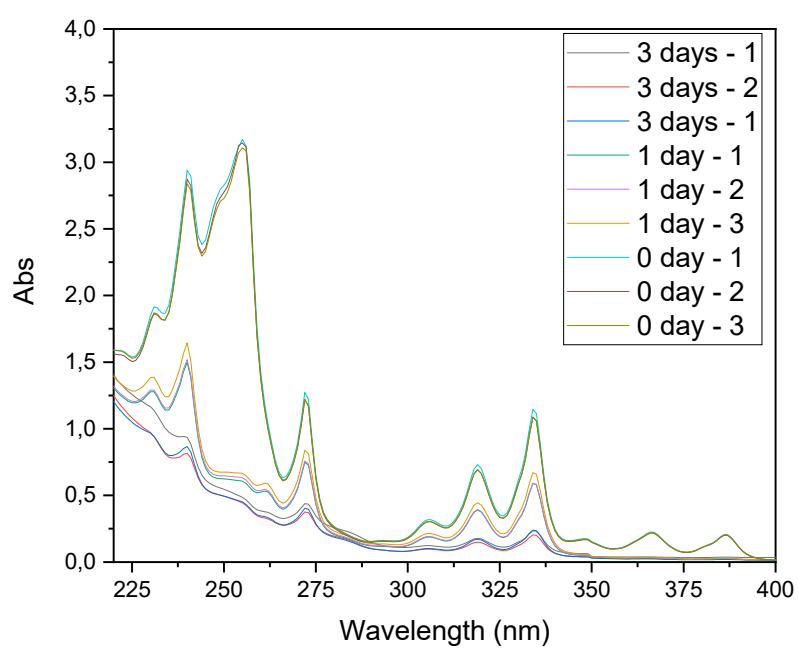

**Figure S13.** UV/VIS spectra of experiments performed in 0, 1 and 3 days with WLP 0% of H<sub>2</sub>O<sub>2</sub>.

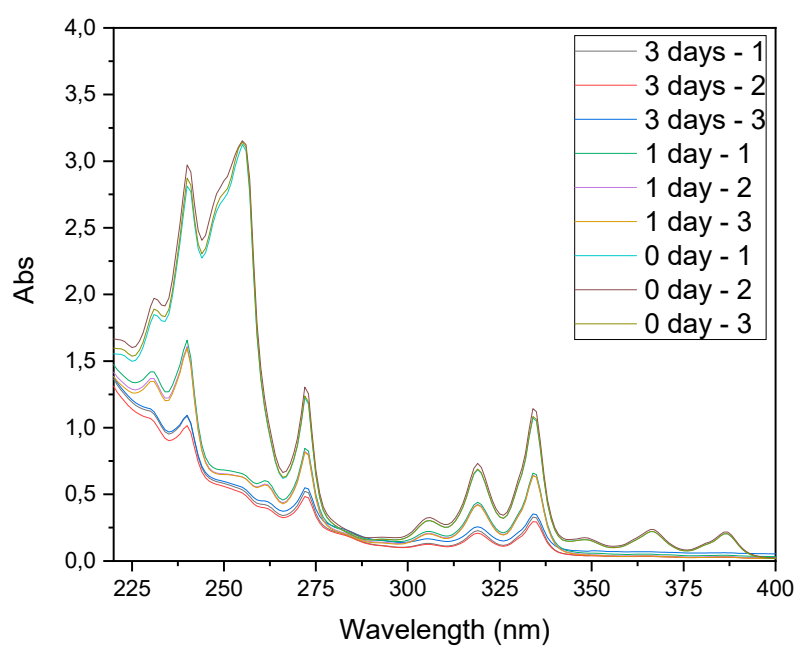

**Figure S14.** UV/VIS spectra of experiments performed in 0, 1 and 3 days with WLP 0.35% of  $H_2O_2$ .

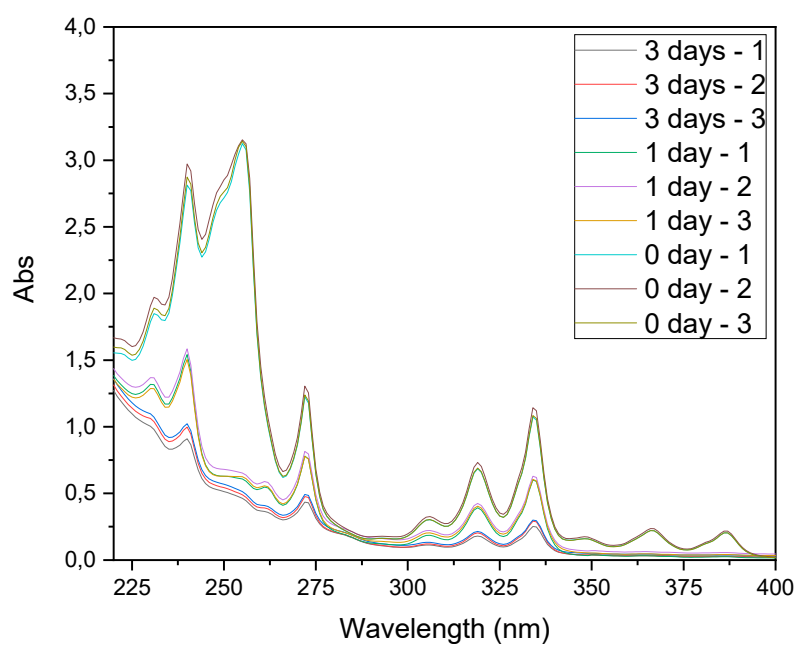

**Figure S15.** UV/VIS spectra of experiments performed in 0, 1 and 3 days with WLP 3.5% of  $H_2O_2$ .

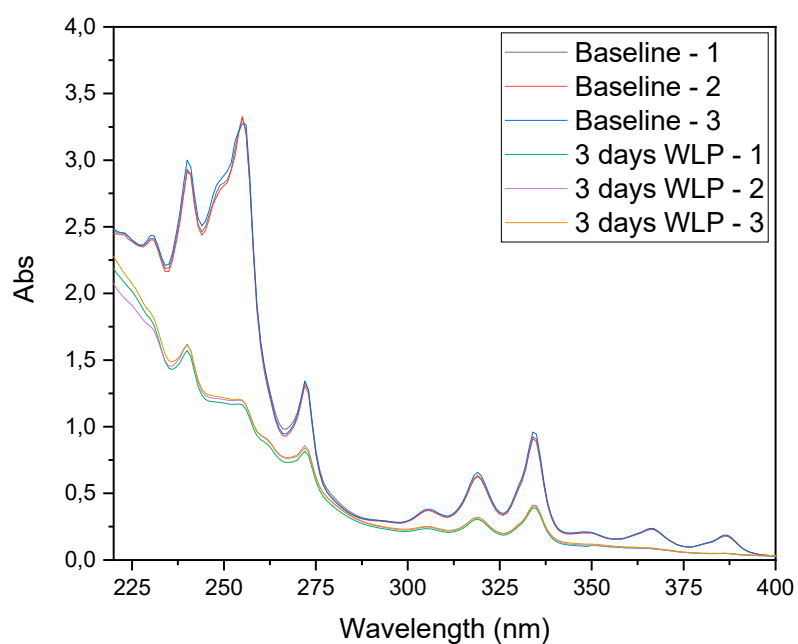

**Figure S16.** UV/VIS spectra of decontamination procedure performed for WLP decon for 3 days with 0% of H<sub>2</sub>O<sub>2</sub>.

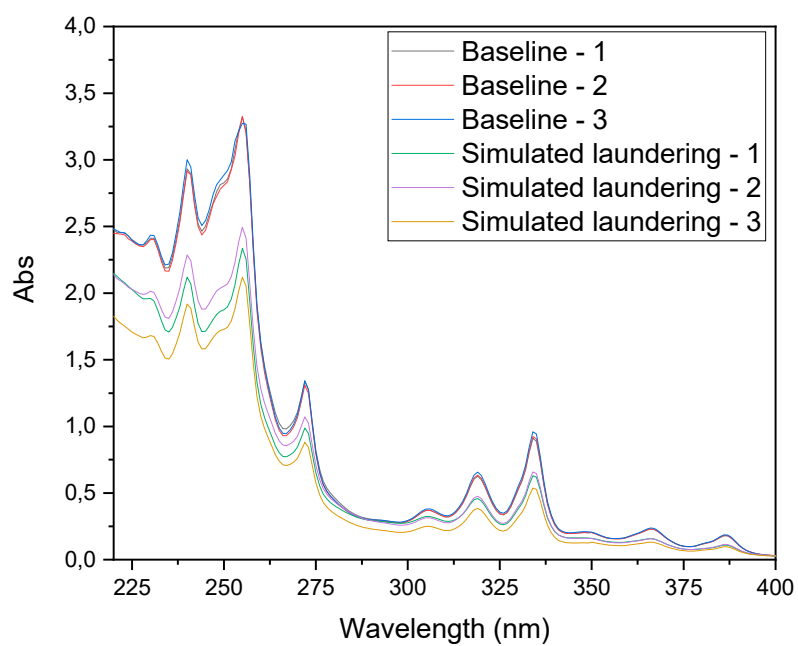

**Figure S17.** UV/VIS spectra of decontamination procedure performed for simulated laundering decon.



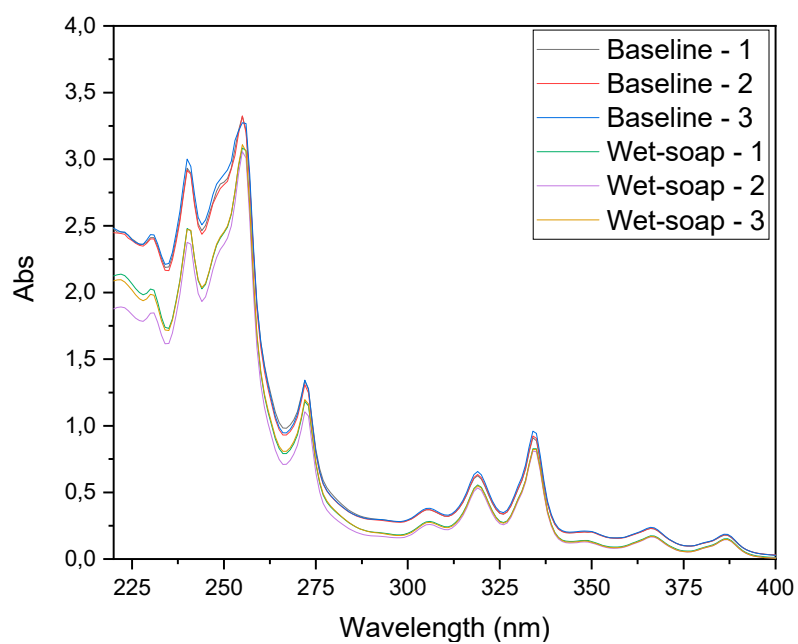

Figure S18. UV/VIS spectra of decontamination procedure performed for wet-soap brushing decon.

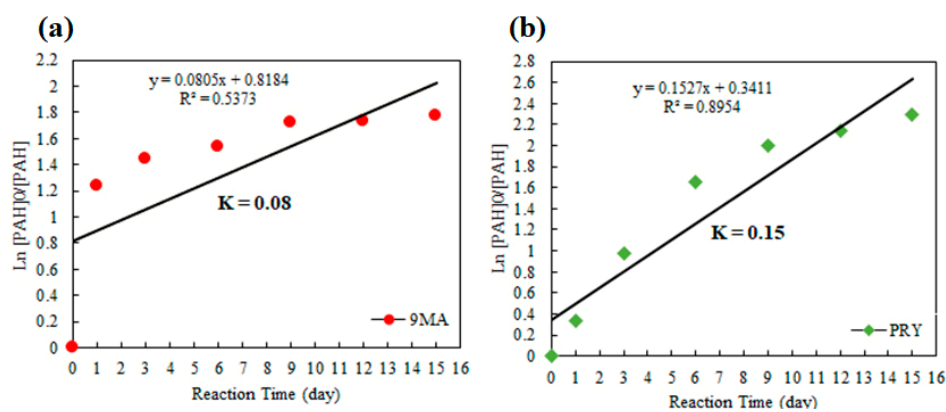

Figure S19. Pseudo first order rate constants for WLP 0% of  $H_2O_2$  reaction of a) 9-methylantracene and b) pyrene degradation.

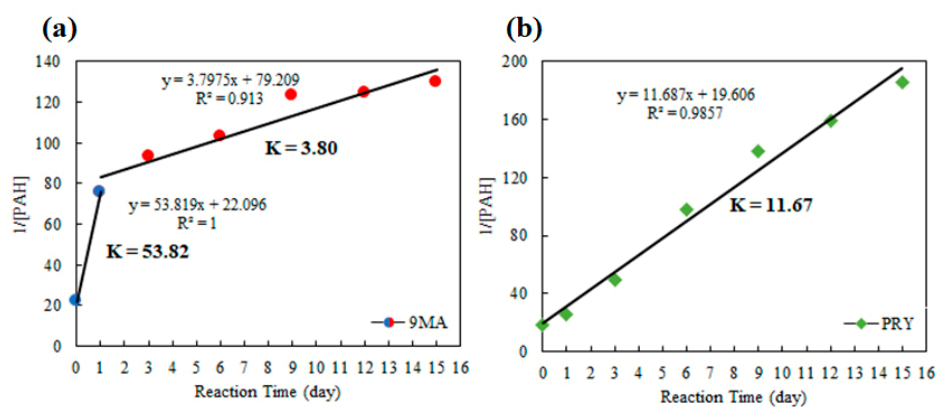

Figure S20. Pseudo second order rate constants for WLP 0% of  $H_2O_2$  reaction of a) 9-methylantracene and b) pyrene degradation.

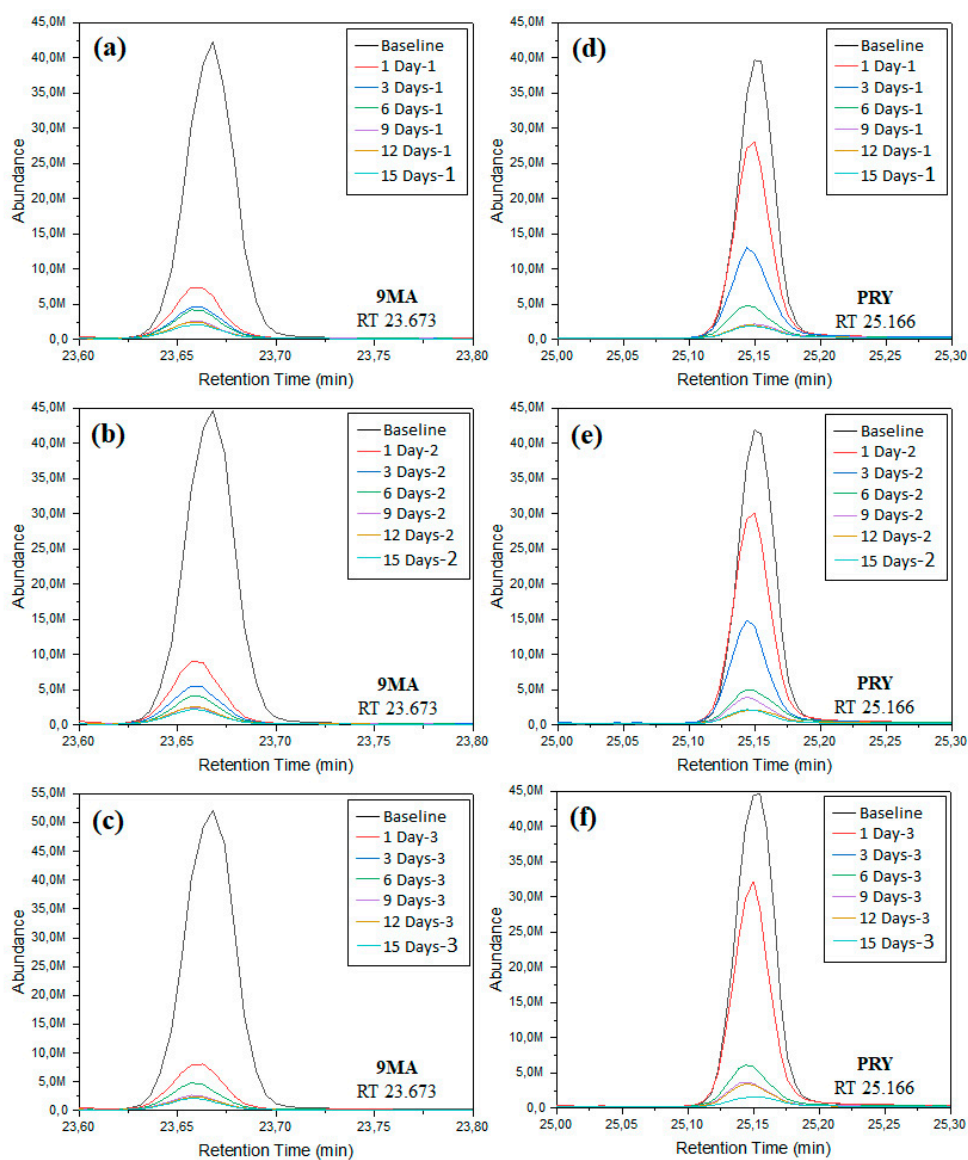

**Figure S21.** Chromatograms replicas of WLP 0% H<sub>2</sub>O<sub>2</sub> experiments for the analyte 9-methylanthracene (a-c) obtained in the retention time of 23.673 min and for the analyte pyrene (d-f) obtained in the retention time of 25.166 min.

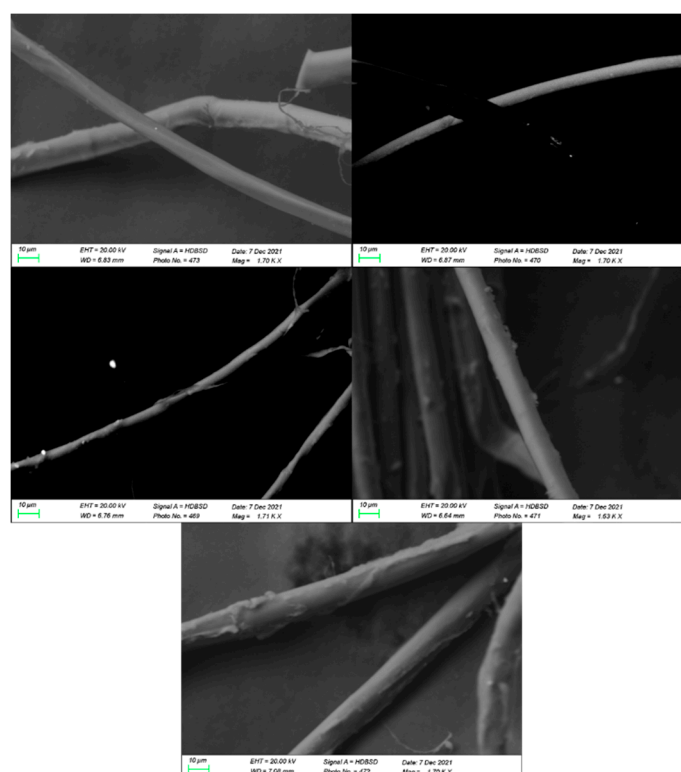

Figure S22. Micrographs of fibers before treatment.

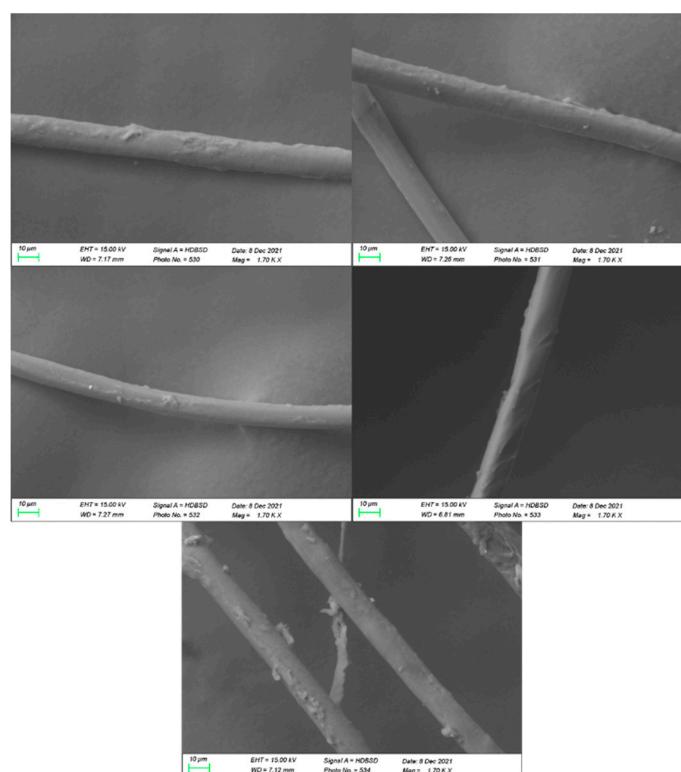

Figure S23. Micrographs of fibers after treatment with BLK 0% of H<sub>2</sub>O<sub>2</sub>.

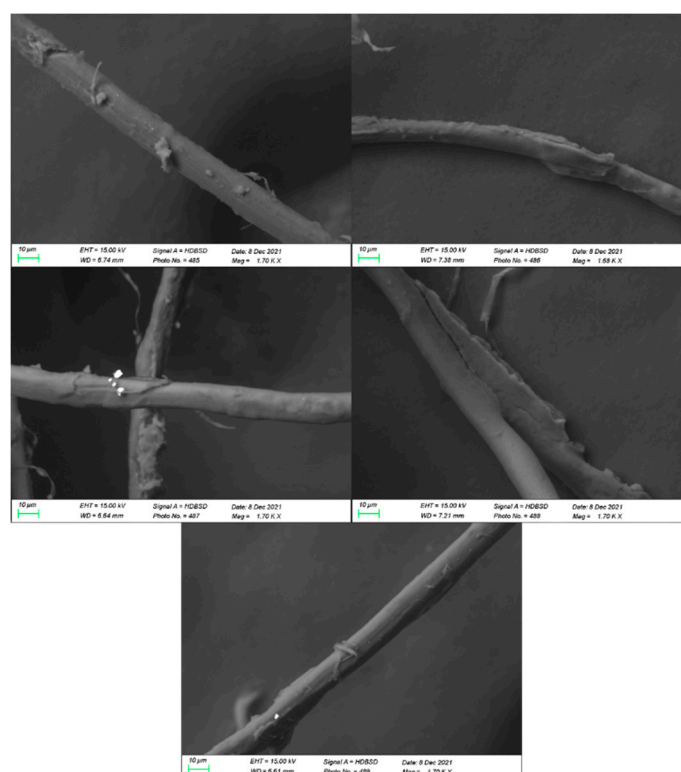

Figure S24. Micrographs of fibers after treatment with BLK 0.35% of  $H_2O_2$ .

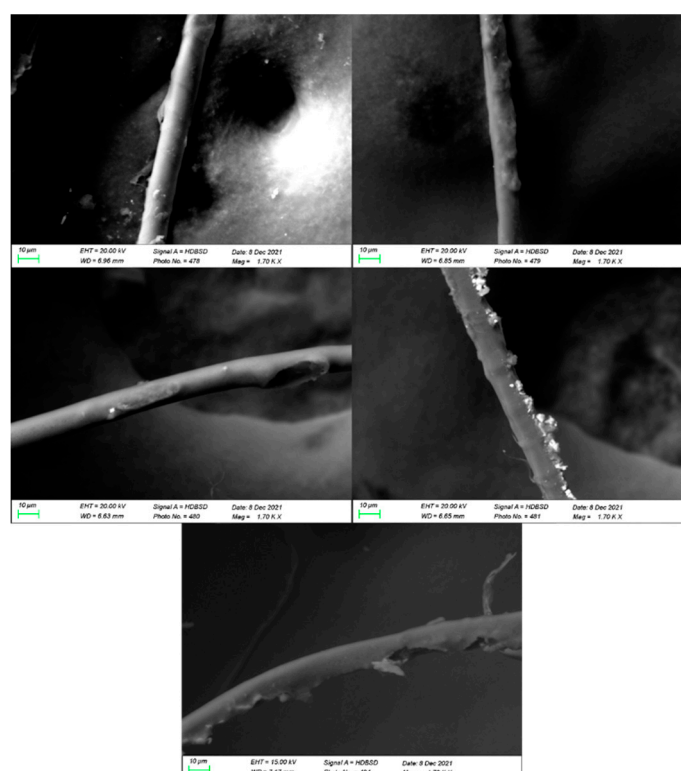

Figure S25. Micrographs of fibers after treatment with BLK 3.5% of  $H_2O_2$ .

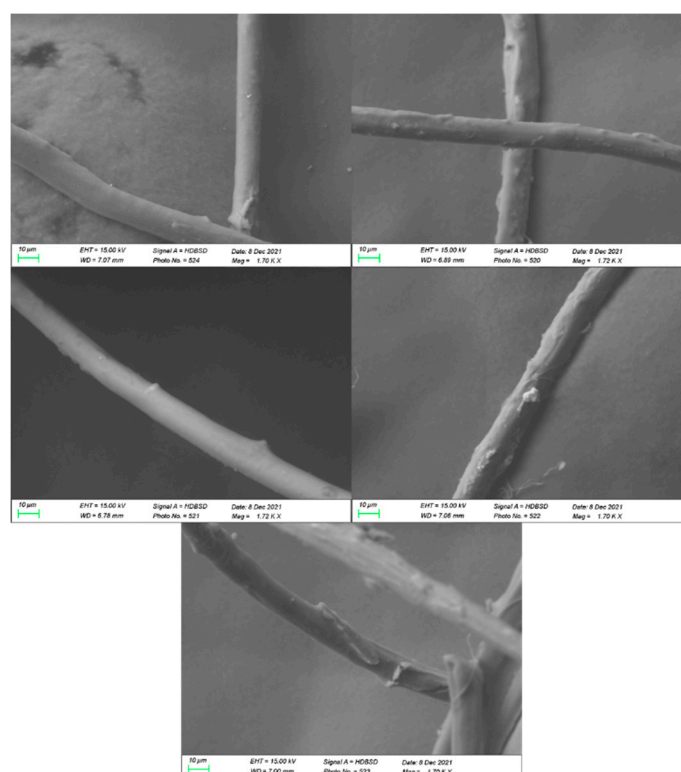

**Figure S26.** Micrographs of fibers after treatment with WLP 0% of  $H_2O_2$ .

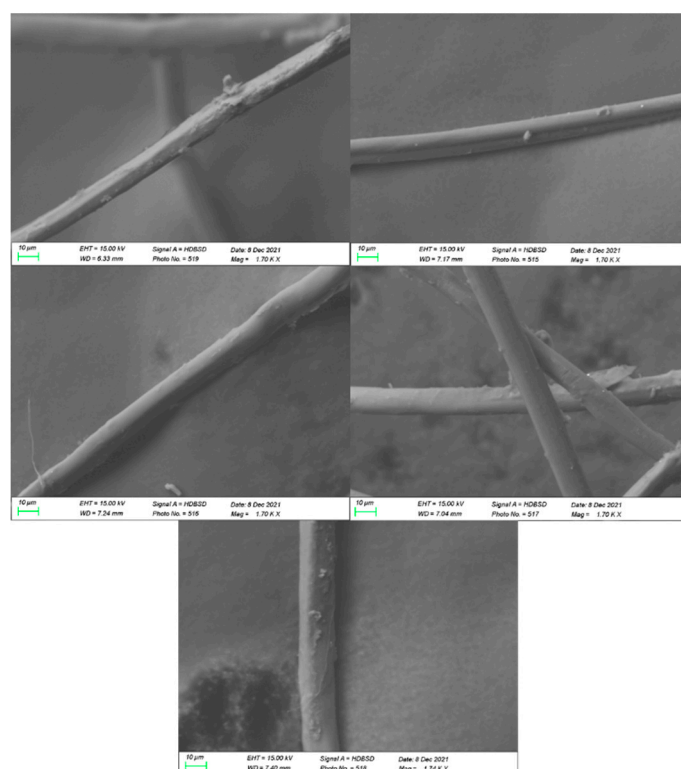

**Figure S27.** Micrographs of fibers after treatment with WLP 0.35% of  $H_2O_2$ .

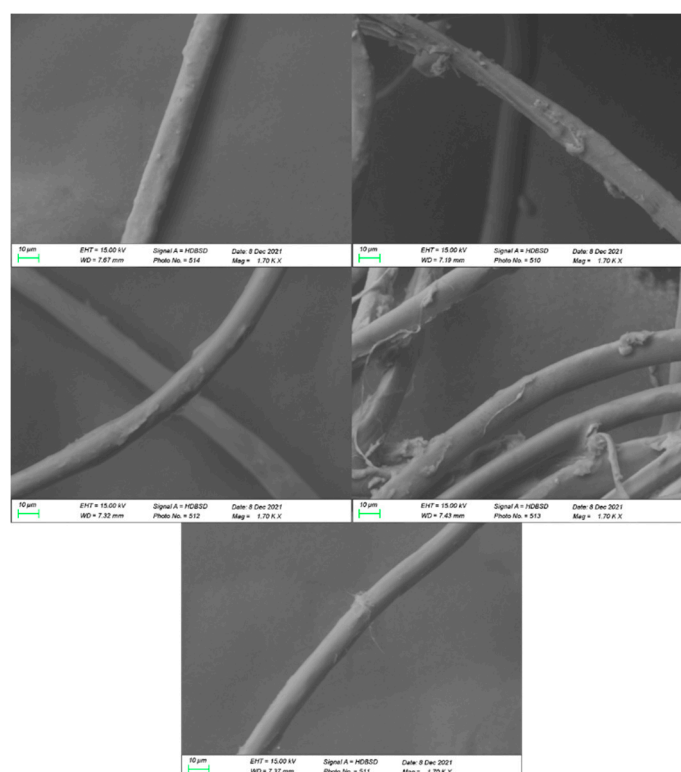

Figure S28. Micrographs of fibers after treatment with WLP 3.5% of  $H_2O_2$ .

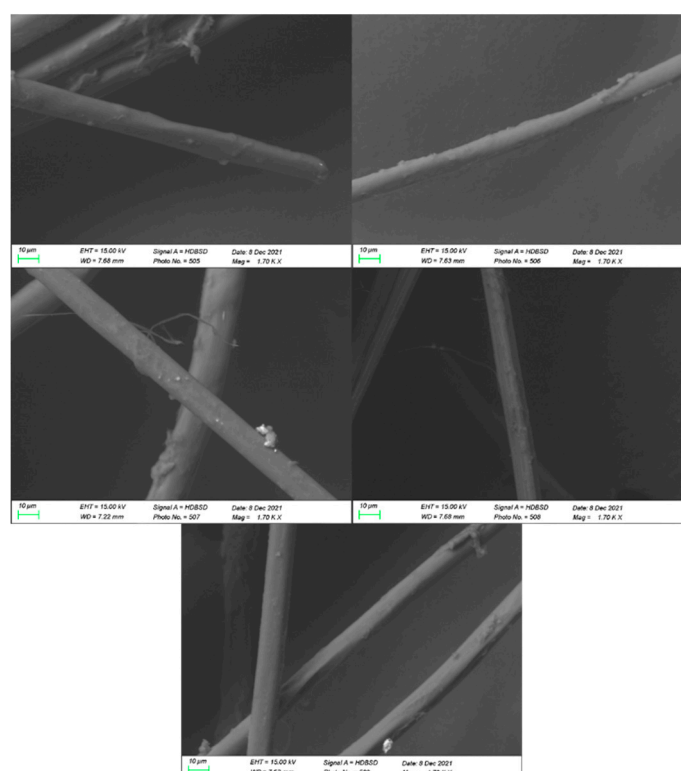

Figure S29. Micrographs of fibers after treatment with WLP 0% of  $H_2O_2$  for 30 days.



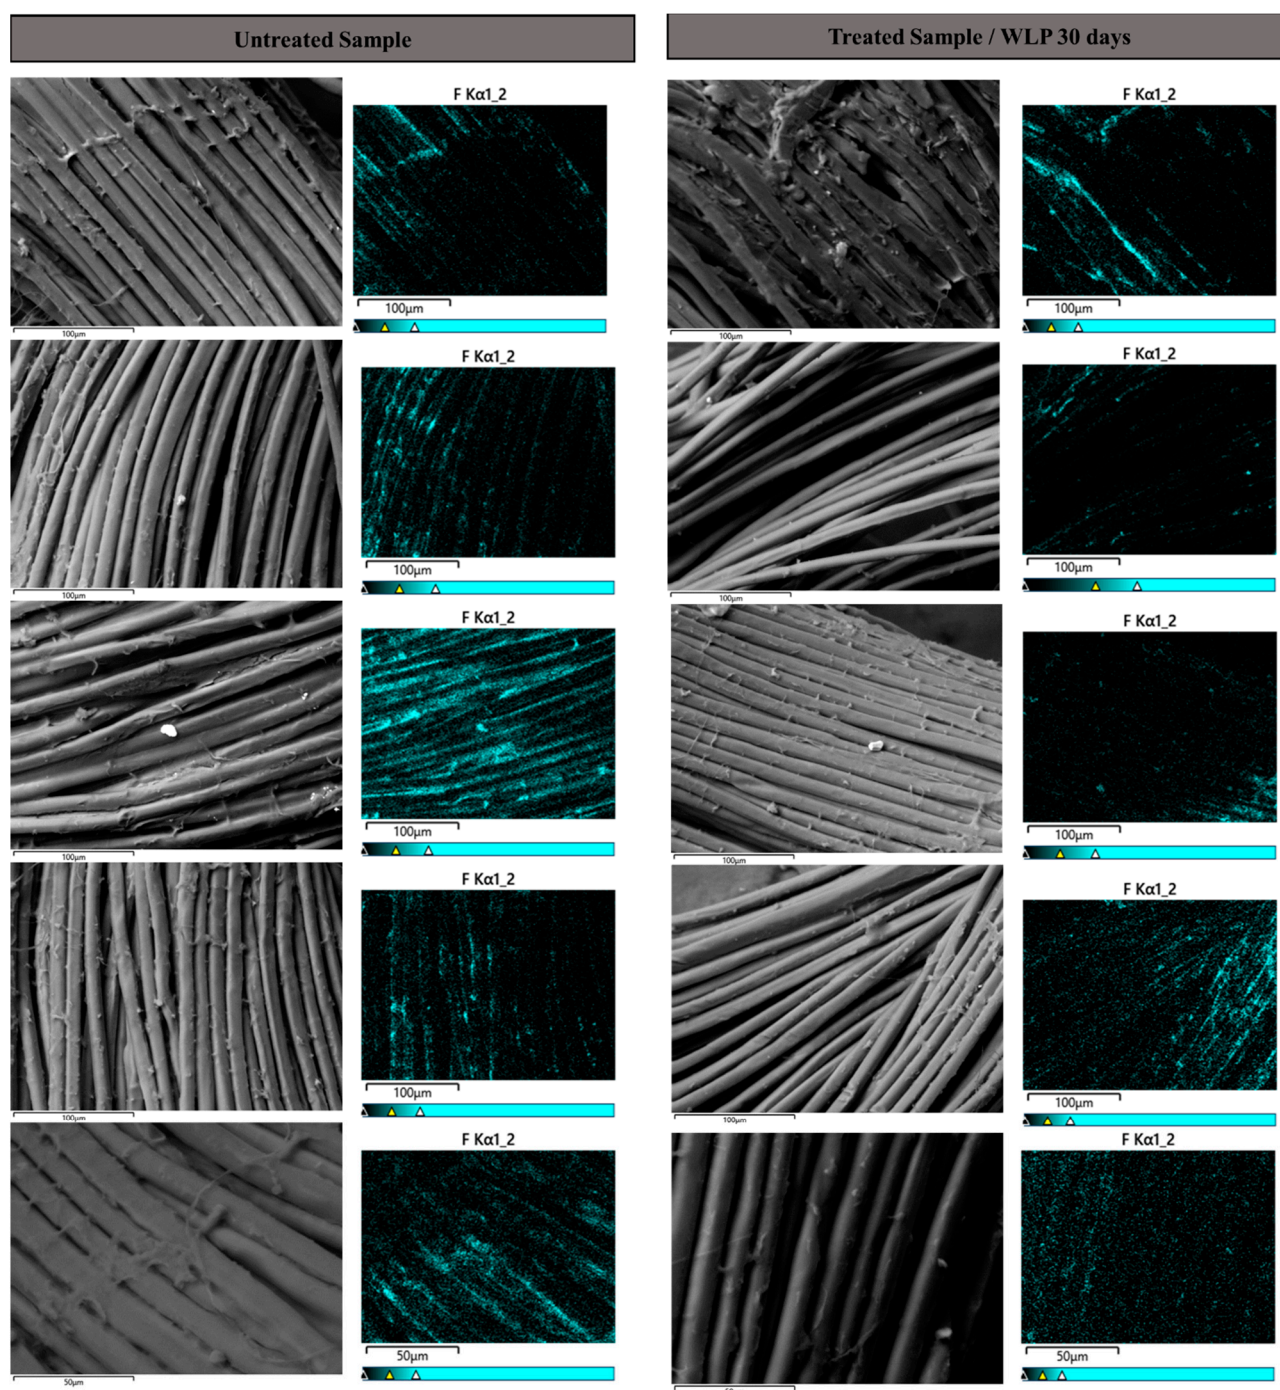

**Figure S30.** Compositional maps for fluorine for the untreated sample and for the treated sample with WLP and 0% H<sub>2</sub>O<sub>2</sub> for 30 days.
